# Supplementary material for: WSX-1 Signalling Inhibits CD4+ T Cell Migration to the Liver during Malaria Infection by Repressing Chemokine-Independent Pathways
Source: PubMed Central journal article supplement (PMC3820588; doi:10.1371/journal.pone.0078486), 2013-11-07

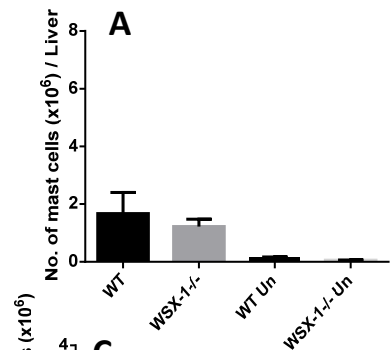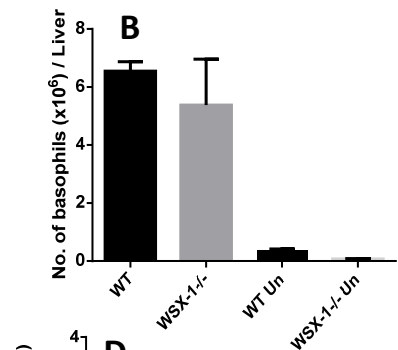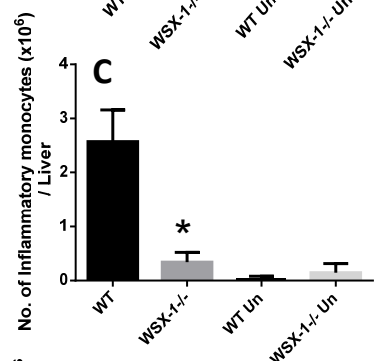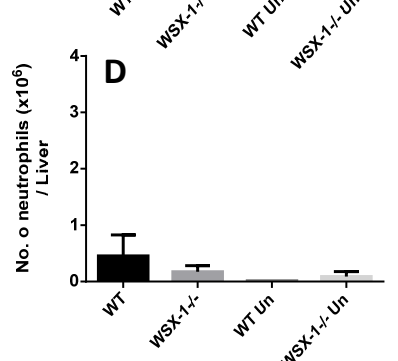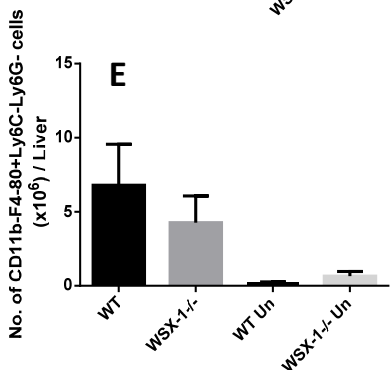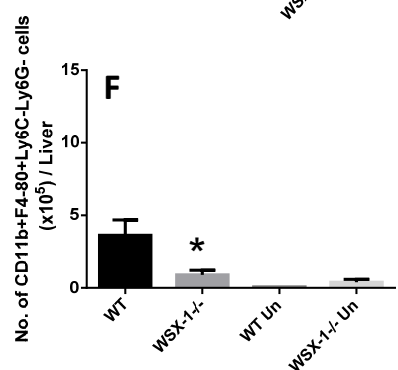

Supplement: pone.0078486.s002.pdf [file pone.0078486.s002.pdf]
